# Supplementary material for: Nucleolar protein interacting with the FHA domain of MKI67 may be an important factor in promoting the development of colorectal cancer: a comprehensive study integrating bulk RNA-seq, scRNA-seq, protein immunohistochemistry and CRISPR
Source: Research Square preprint supplement (doi:10.21203/rs.3.rs-4156321/v1), 2024-03-28
Supplement: Supplementary file 1 [file 7e40eeeca66af8d15d6afdaf.docx]

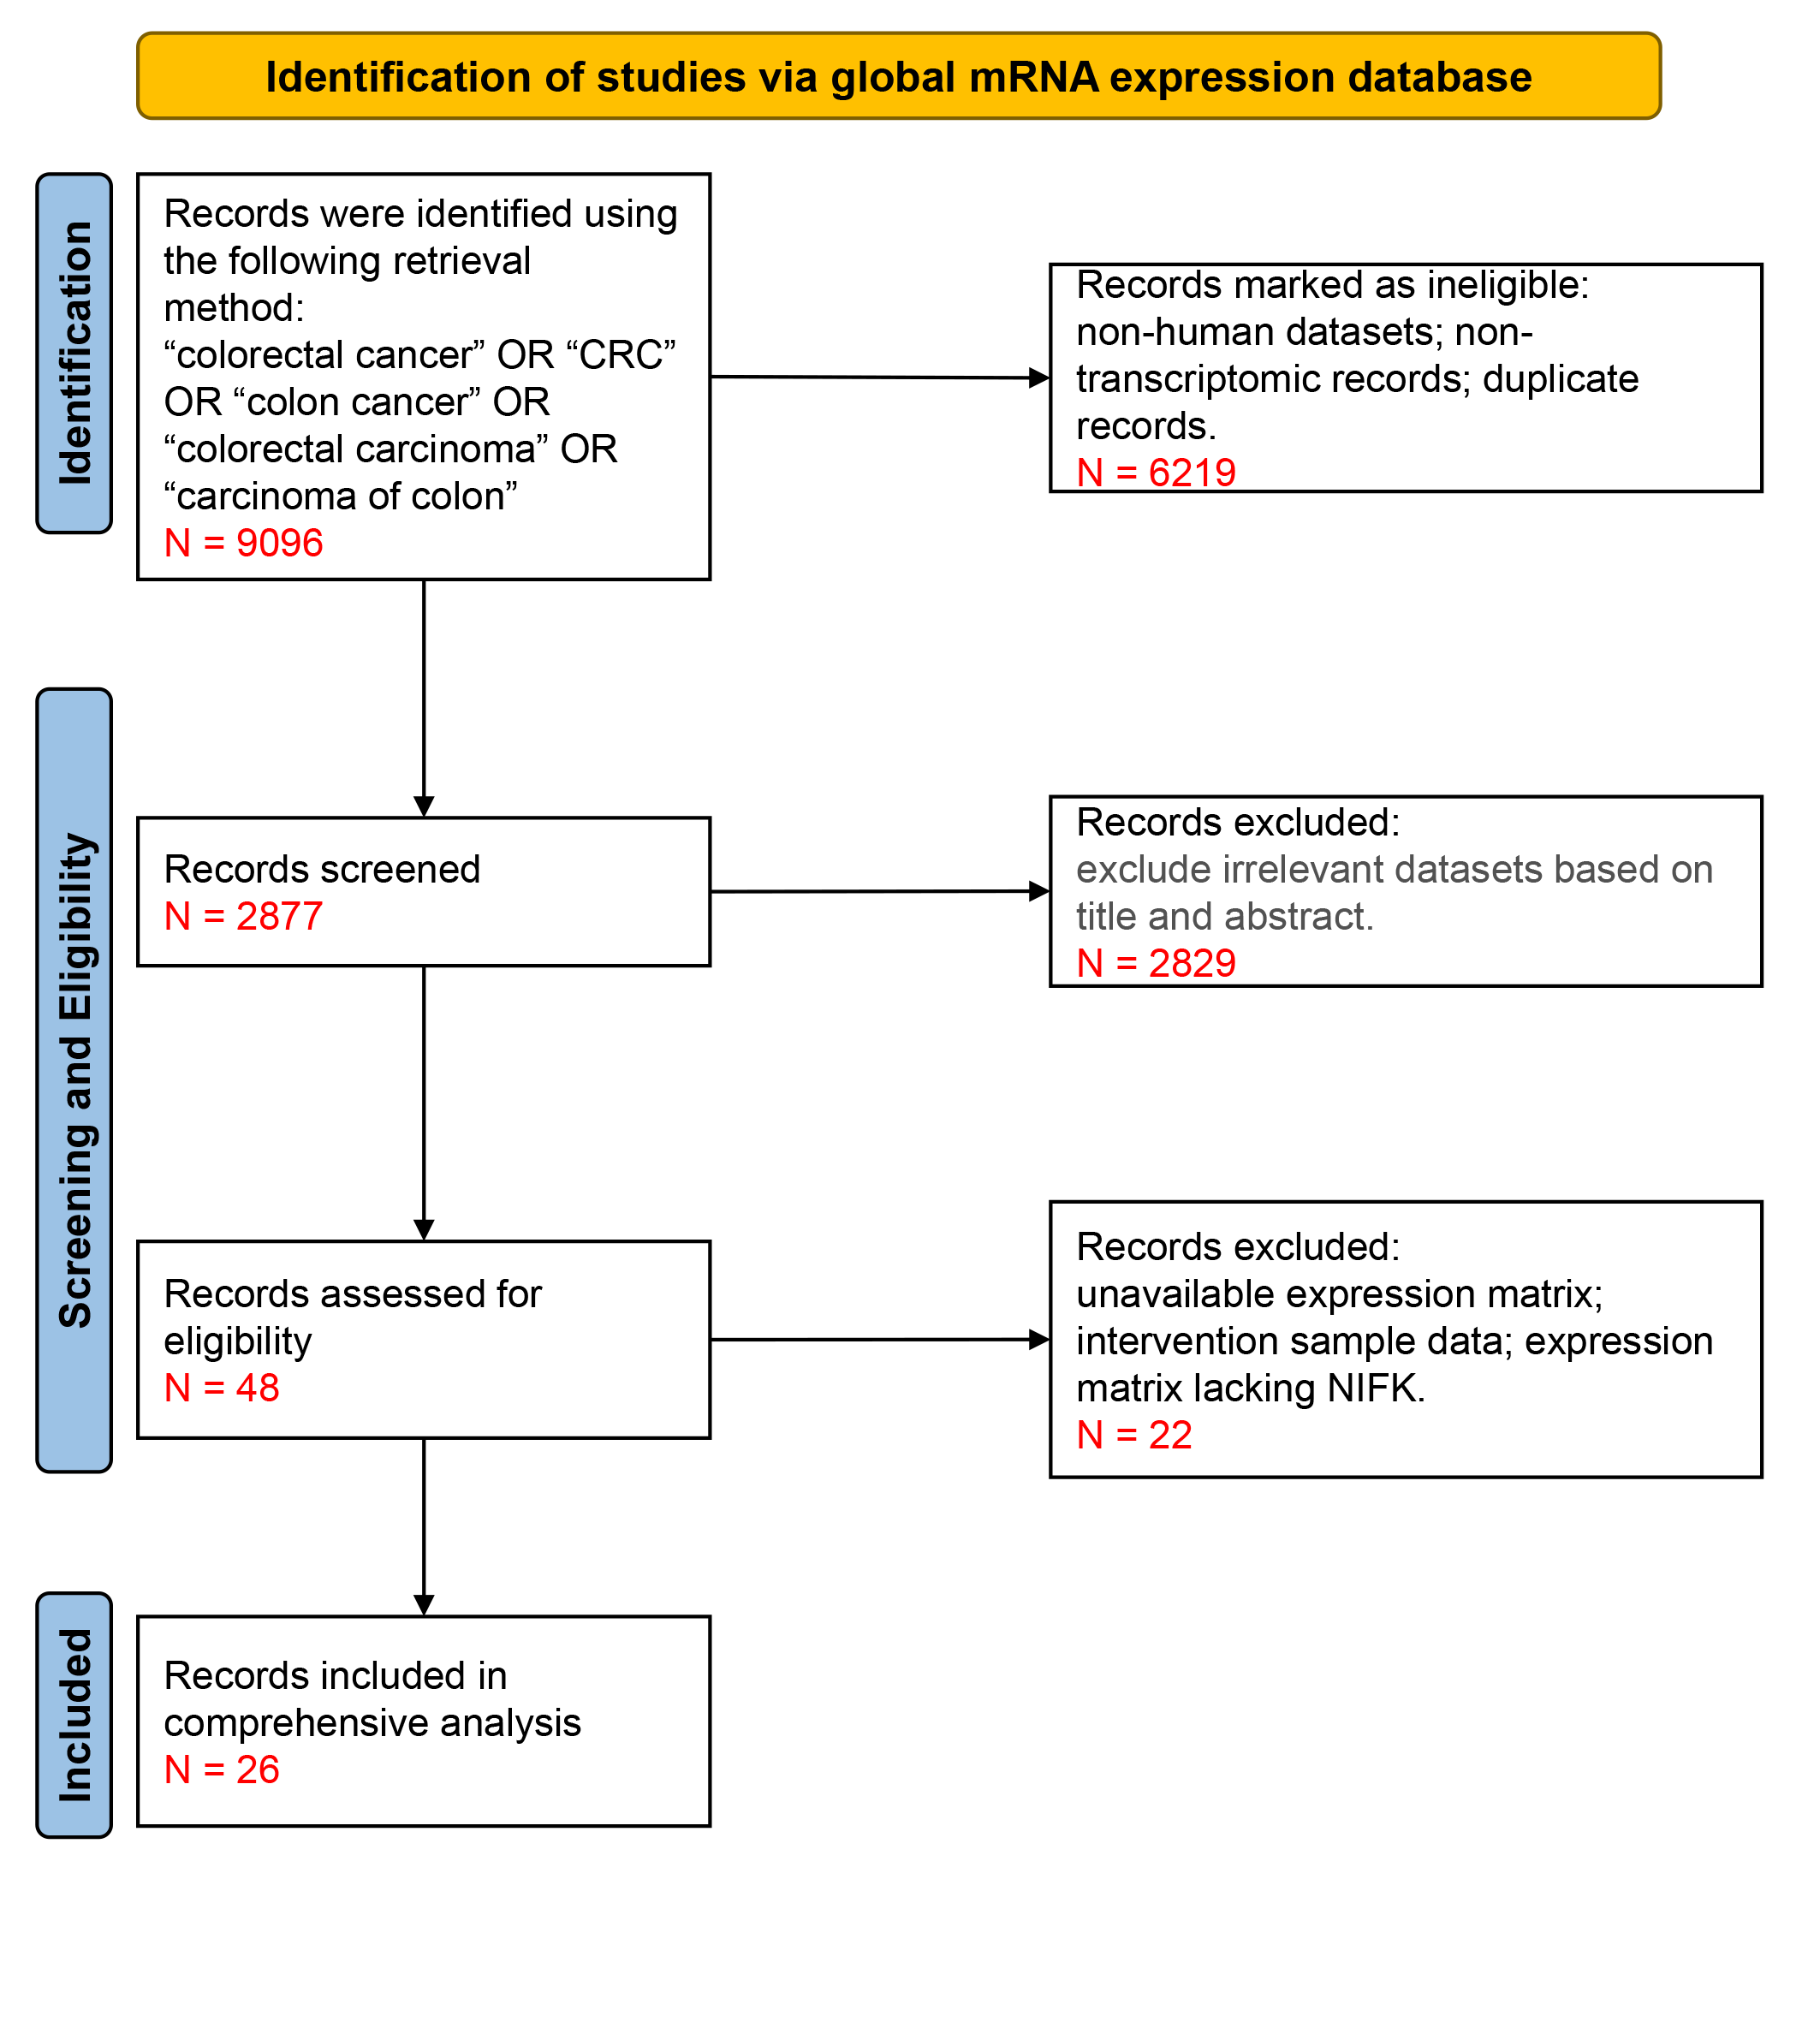


Figure S1: Flowchart of the inclusion of CRC tissue mRNA expression datasets in this study


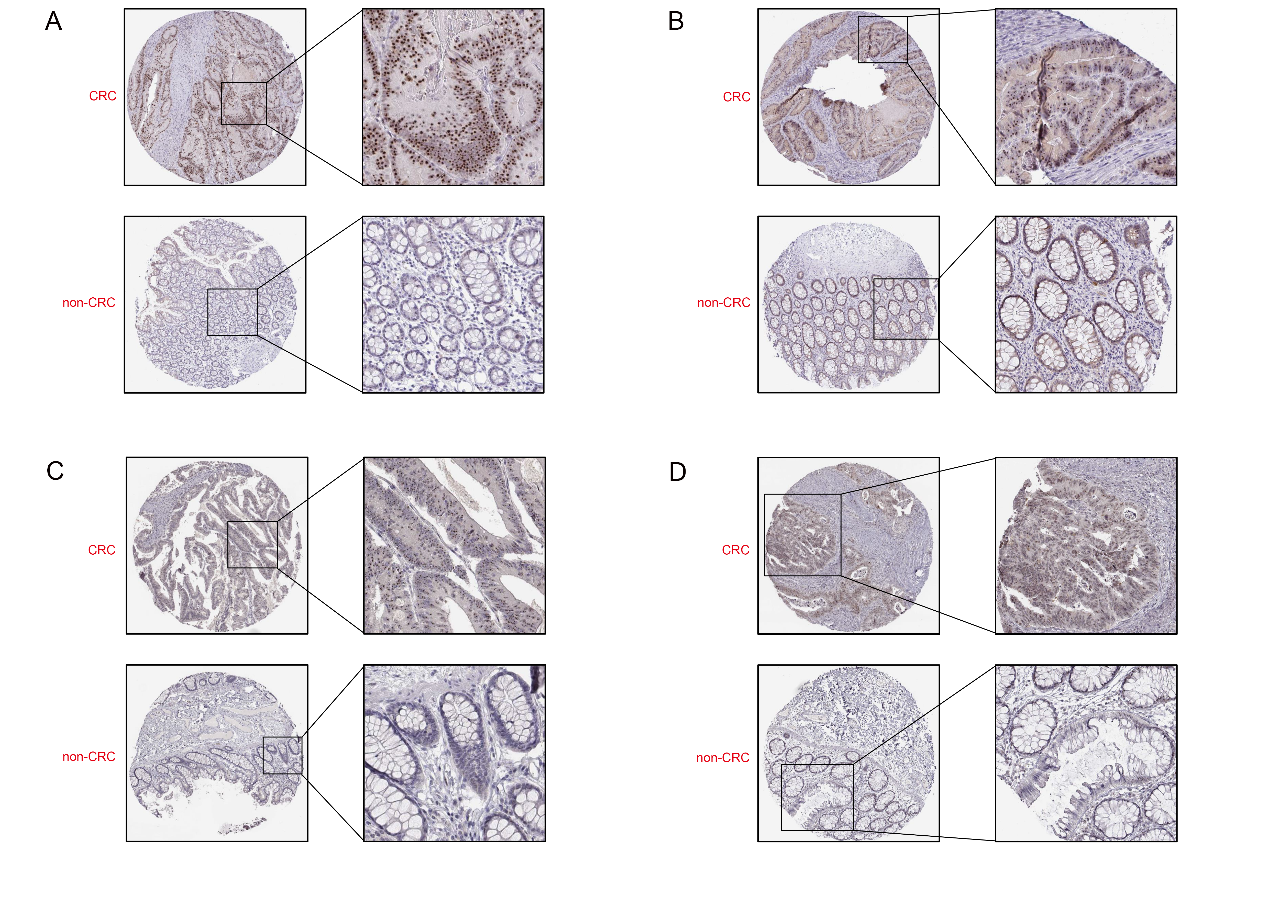


Figure S2: Differences in NIFK protein between CRC tissue and non-CRC tissue in the THPA database

(A) HPA035735;

(B) HPA035736;

(C) CAB075728;

(D) CAB075729.


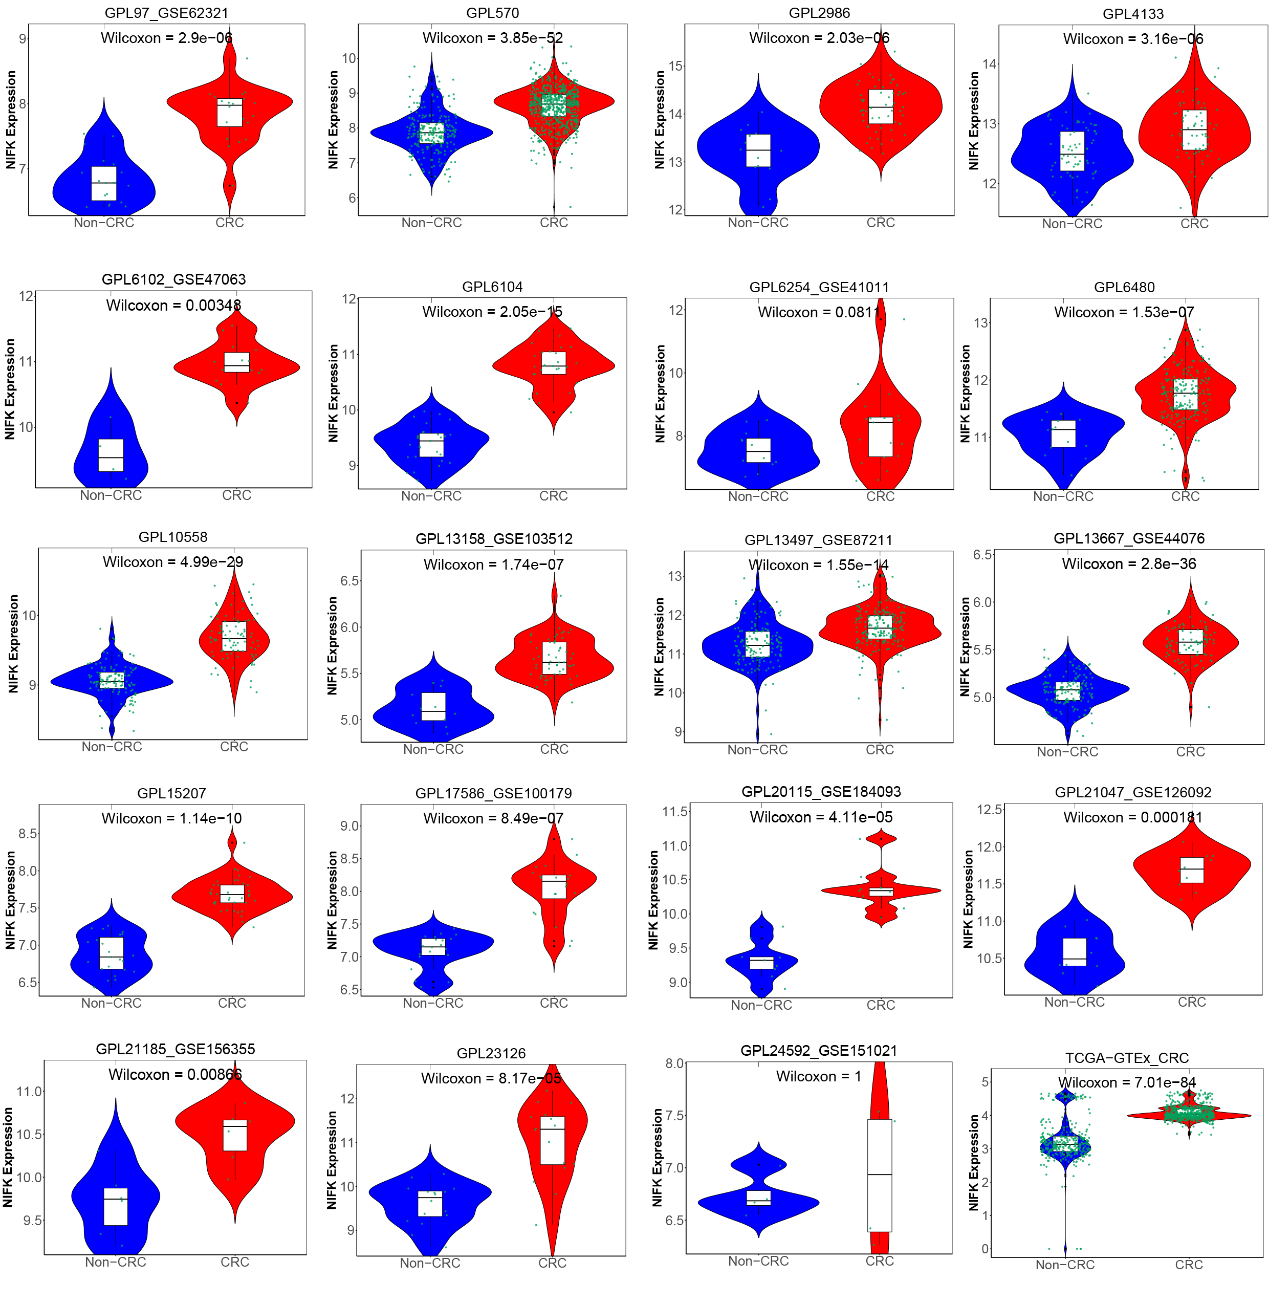


Figure S3: Violin plot of the expression status of NIFK mRNA in CRC tissue in each dataset


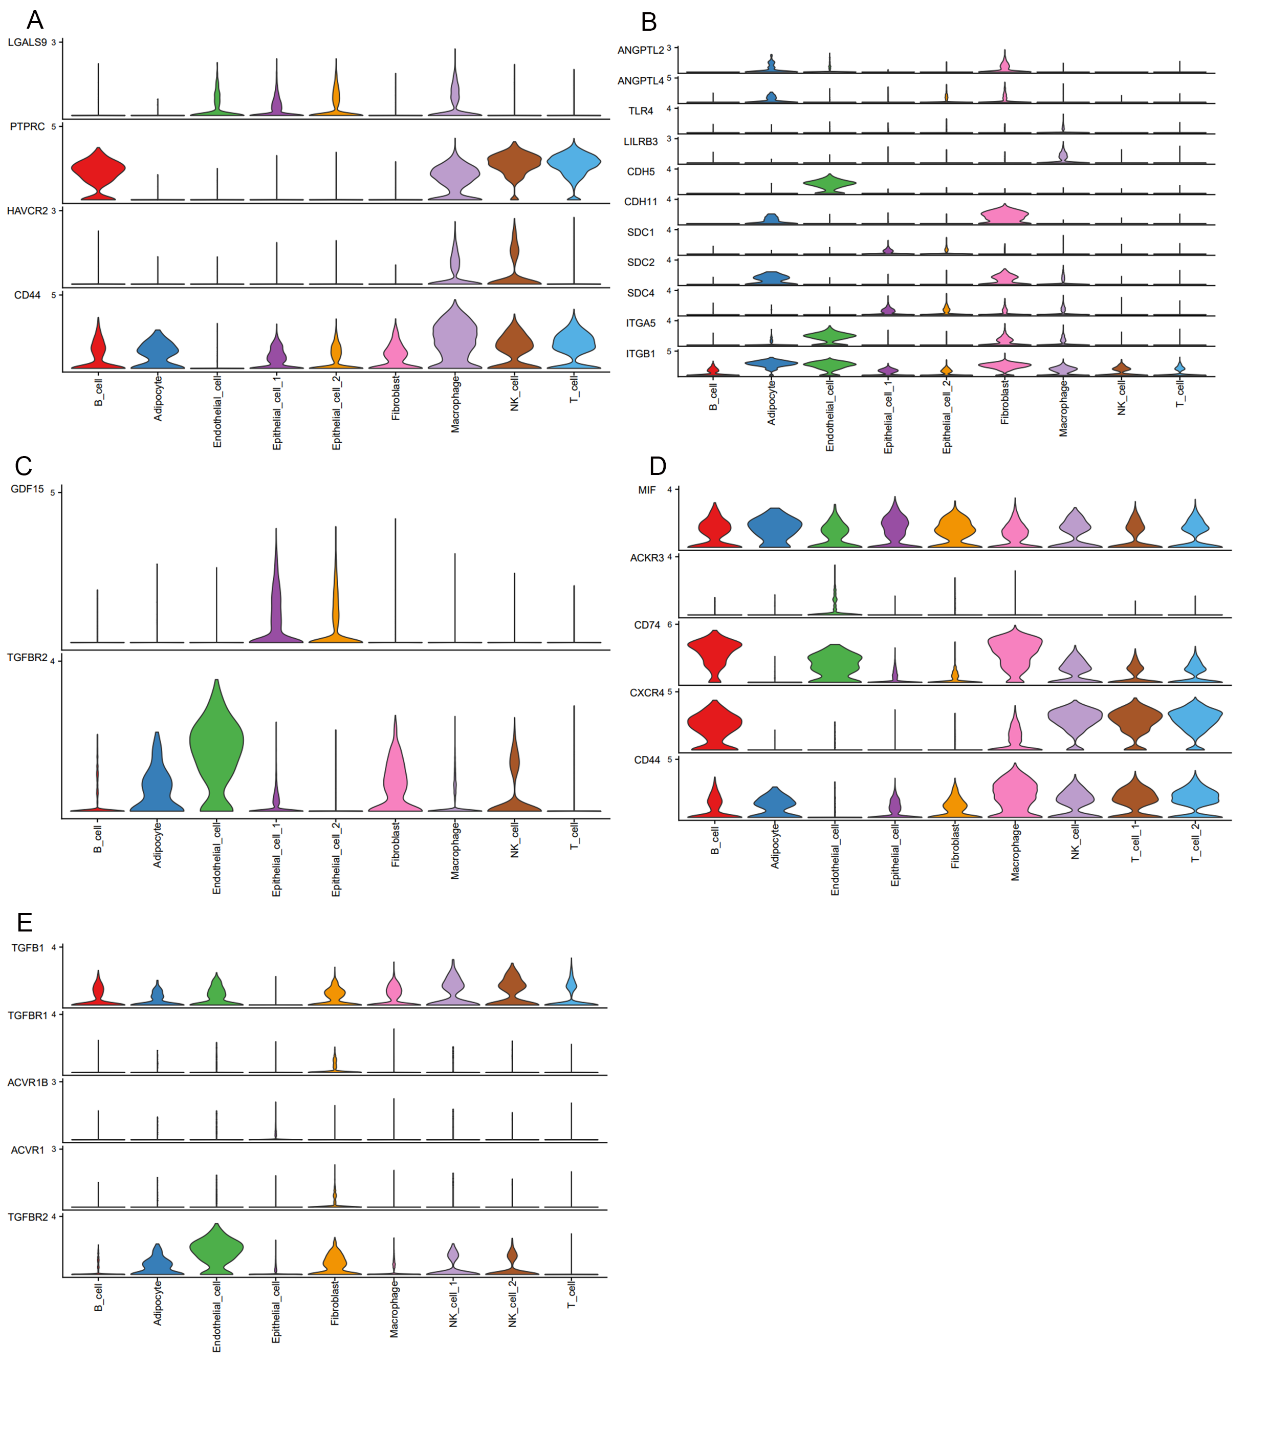


Figure S4: Expression levels of some key molecules in signalling pathways in various cells in CRC tissue

(A)GALECTIN signalling pathway;

(B)ANGPTL signalling pathway;

(C)GDF signalling pathway;

(D)MIF signalling pathway;

(E)TGFb signalling pathway.


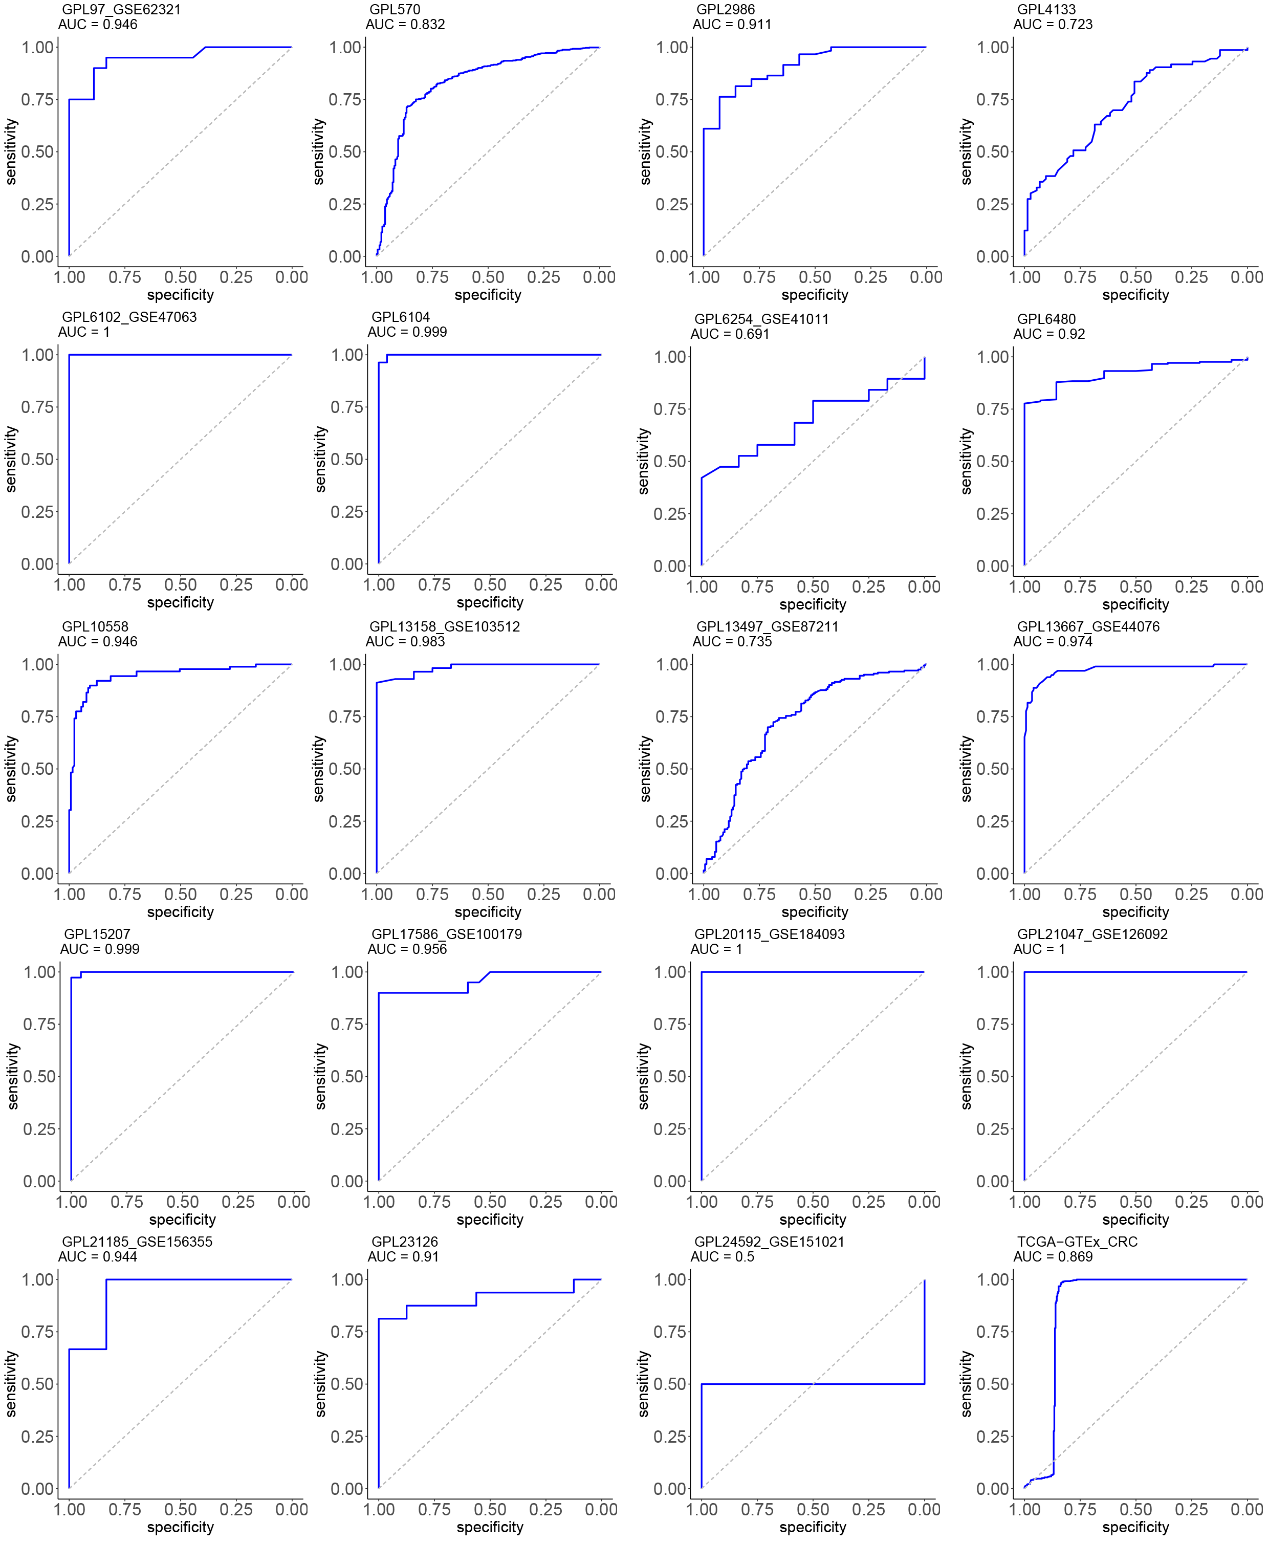


Figure S5: ROC curve of the expression status of NIFK mRNA in CRC tissue in each dataset


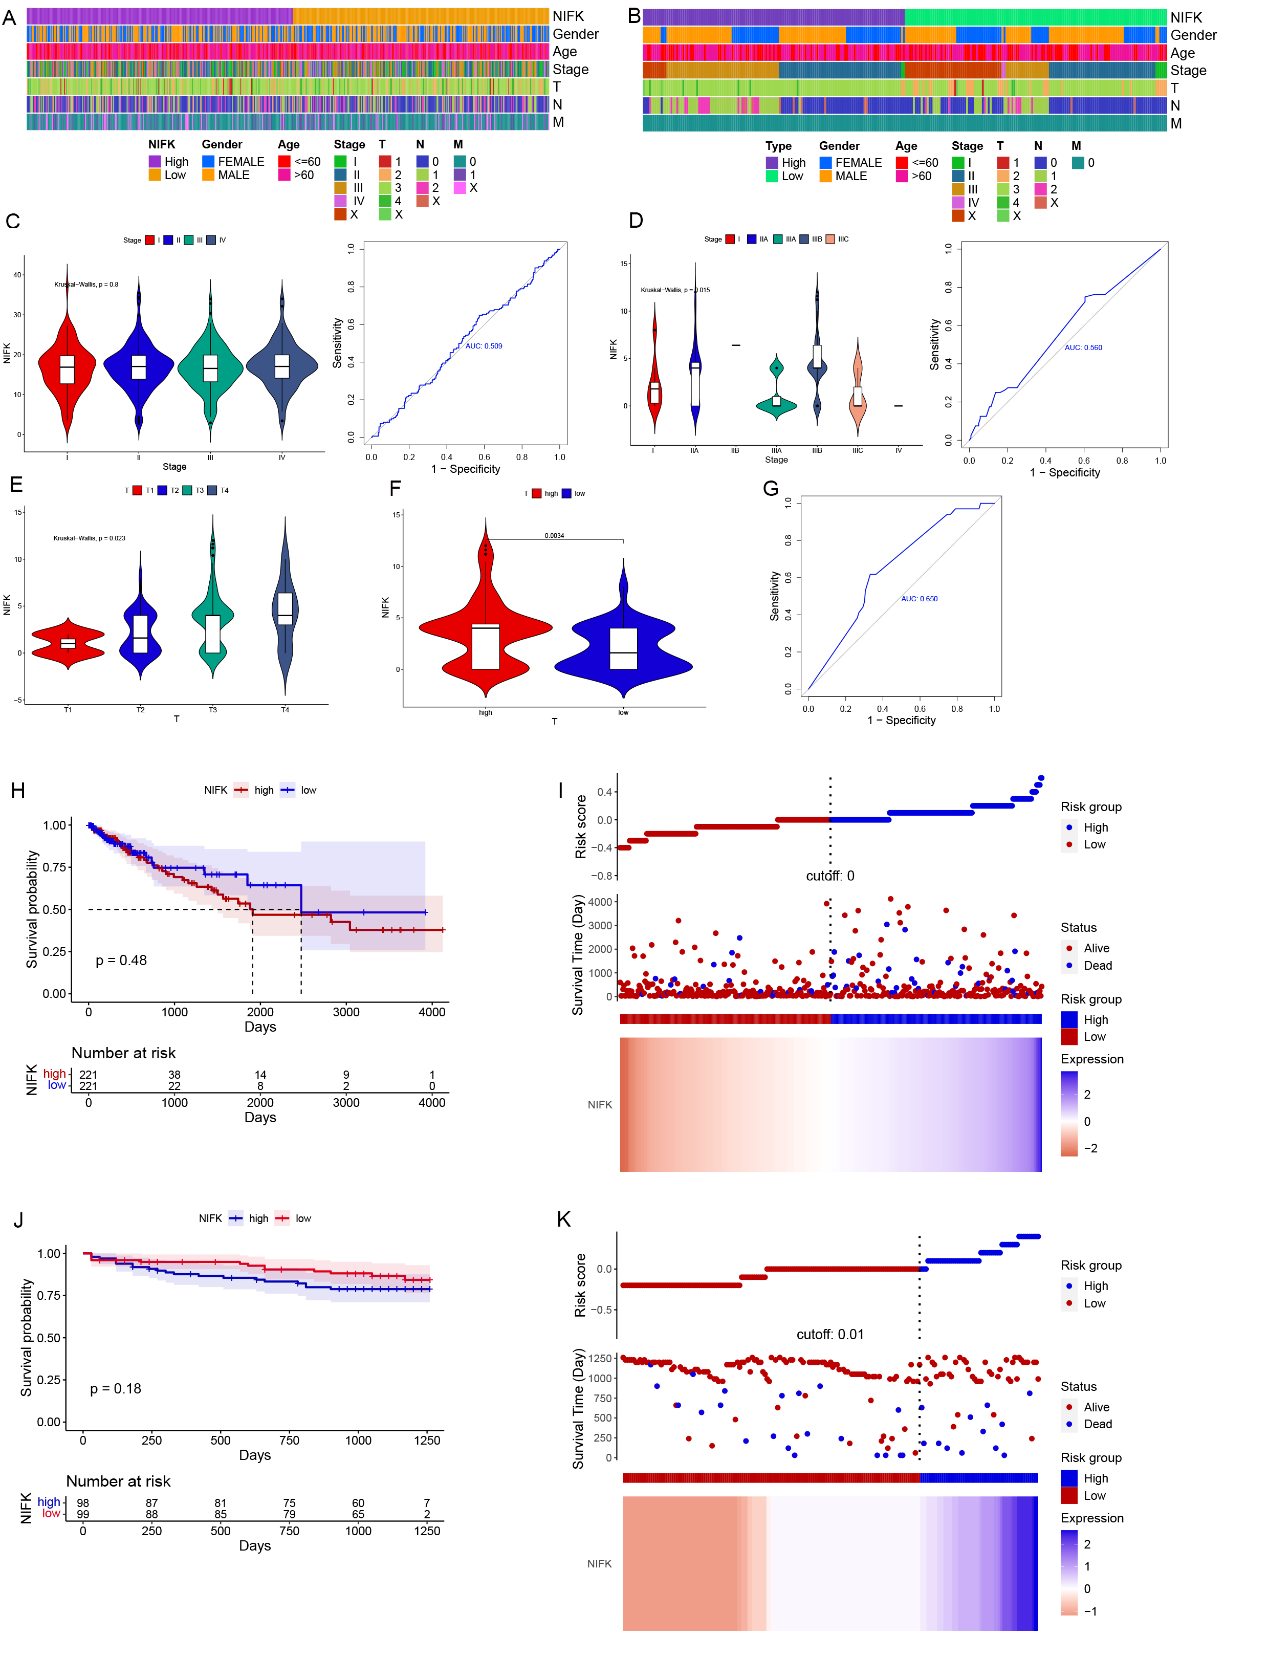


Figure S6: Relationship between NIFK mRNA and protein expression levels in CRC tissue and clinicopathological parameters

(A-B) NIFK mRNA and protein expression, and clinical parameters heat map of CRC tissue samples;

(C-D) Differences in NIFK mRNA and protein expression levels in CRC tissue of different clinical stages;

(E)Differences in NIFK protein expression levels in CRC tissue of different T stages;

(F-G) Differences in NIFK protein expression levels between higher T stage (T3+T4) CRC tissue and lower T stage (T1+T2) CRC tissue;

(H-J) Survival curves between high and low expression groups of NIFK mRNA and protein;

(I-K) Analysis of risk factors between high and low expression groups of NIFK mRNA and protein.
